# Supplementary material for: KY19382 Accelerates Cutaneous Wound Healing via Activation of the Wnt/β-Catenin Signaling Pathway
Source: MDPI journal article supplement (doi:10.3390/ijms241411742), 2023-07-21
Supplement: s1 [file s1]

**A**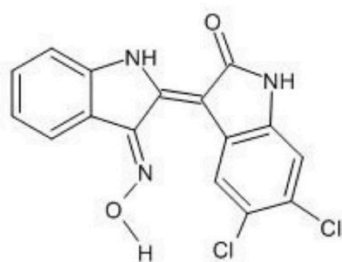

KY19382  
(5, 6-dichloroindirubin-3'-methoxime)

**B**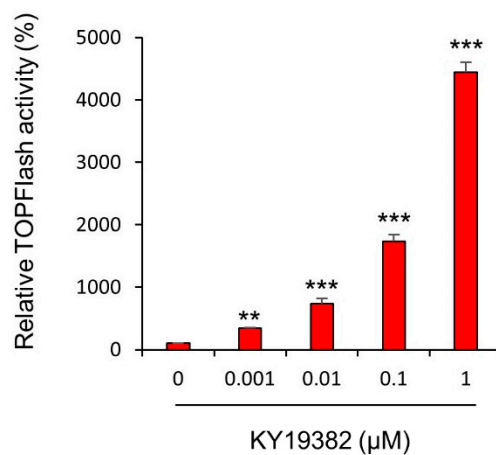

**Supplementary figure 1. TOPFlash reporter activity and cellular toxicity tests of KY19382.** (A) Structure of KY19382. (B) TOPFlash reporter activity of HEK293 cells treated with vehicle (0.1% DMSO), or shown concentrations of KY19382 for 24 h ( $n = 3$ ). Values are

expressed as means  $\pm$  SEM. \*,  $P < 0.05$ ; \*\*,  $P < 0.005$ ; \*\*\*,  $P < 0.0005$ , significantly different from vehicle, control or as indicated.

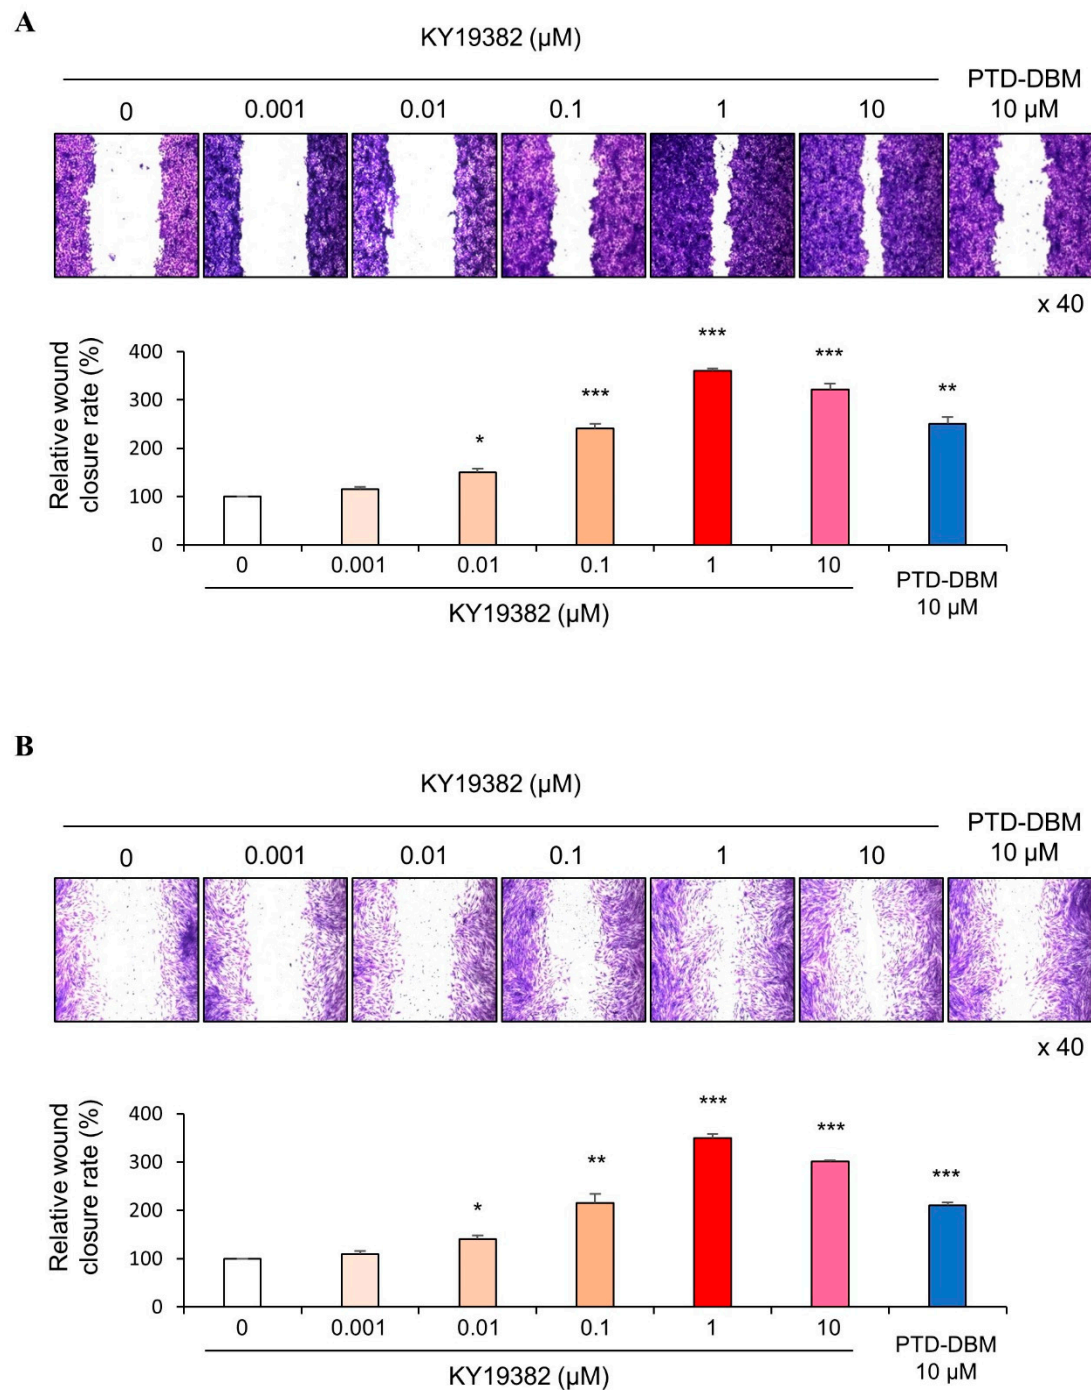

**Supplementary figure 2. Dose-dependent effects of KY19382 on migration of human**

**keratinocytes and dermal fibroblasts.** (A, B) Human keratinocytes and dermal fibroblasts were treated with vehicle (0.1% DMSO), or shown concentrations of KY19382 or PTD-DBM (10  $\mu$ M) for 24 h. ( $n = 3$ ) (A) Representative images of *in vitro* wound healing assay (upper) quantitative measurement of relative wound closure rate (lower) for KY19382 treated human keratinocytes. (B) Representative images of *in vitro* wound healing assay (upper) quantitative measurement of relative wound closure rate (lower) for KY19382 treated human dermal fibroblasts. Values are expressed as means  $\pm$  SEM. \*,  $P < 0.05$ ; \*\*,  $P < 0.005$ ; \*\*\*,  $P < 0.0005$ , significantly different from vehicle, control or as indicated.

**A**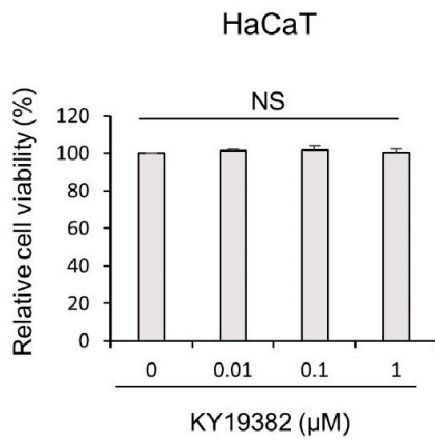**B**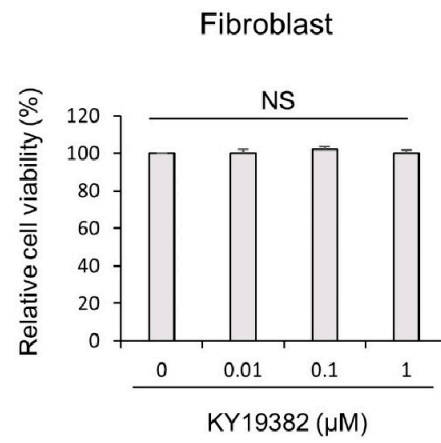**C**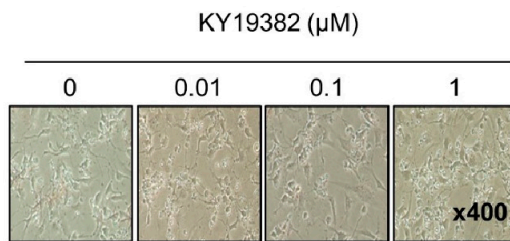

**Supplementary figure 3. Cell viability of KY19382 treated keratinocyte, fibroblast, and neural stem cell.** (A) Cell viability of HaCaT keratinocytes treated with vehicle (0.1% DMSO), or shown concentration of KY19382 for 24 h ( $n = 3$ ). (B) Cell viability of human dermal

fibroblasts treated with vehicle (0.1% DMSO), or shown concentrations of KY19382 for 24 h ( $n = 3$ ). (C) Brightfield images of cultured primary neural stem cell morphology treated by shown concentration of KY19382. Original magnification: (C) x400. Values are expressed as means  $\pm$  SEM. \*,  $P < 0.05$ ; \*\*,  $P < 0.005$ ; \*\*\*,  $P < 0.0005$ , significantly different from vehicle, control or as indicated.
